# Supplementary material for: A Digital Library for Increasing Awareness About Living Donor Kidney Transplants: Formative Study
Source: PubMed Central journal article supplement (PMC7404010; doi:10.2196/17441), 2020-07-21

# STEPS FOR BUILDING A DIGITAL LIBRARY

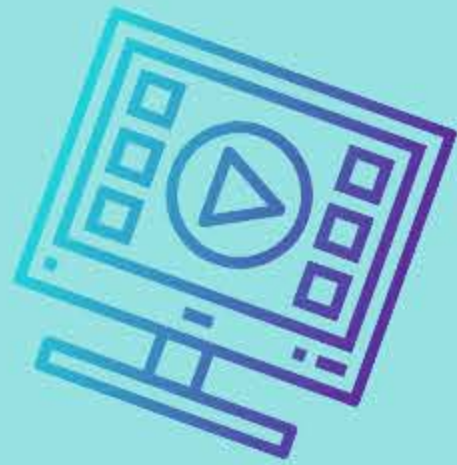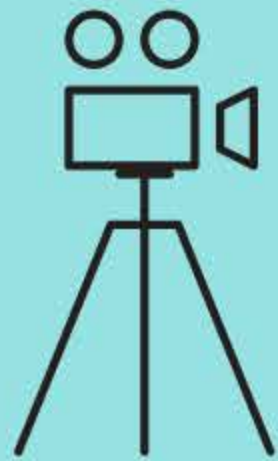

## 1 SELECT AN AUDIENCE

Select an audience of learners

## 2 DETERMINE THEORETICAL APPROACH & MODALITY

Use behavioral theories to determine the best delivery modality for the target audience and necessary features

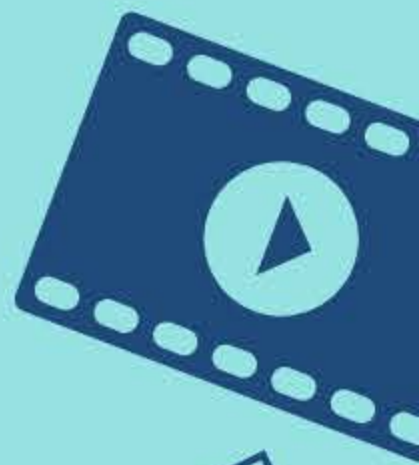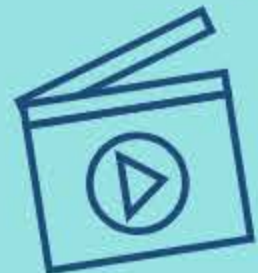

## 3 DRAFT PROMPTS

Draft prompts to probe for valuable change-talk and other educational content that can be used to inspire change in knowledge, attitudes, readiness, or behavior

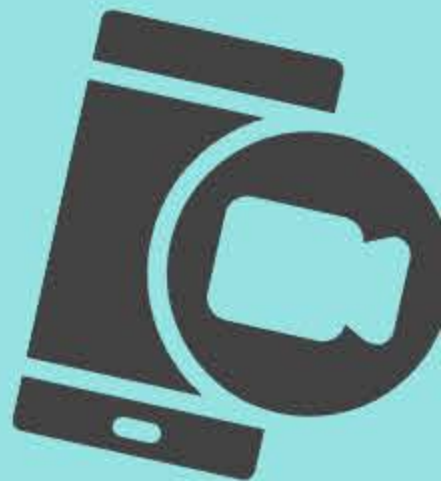

## 4 RECRUIT DIVERSE STORYTELLERS

Recruit diverse storytellers who are representative of the larger target community

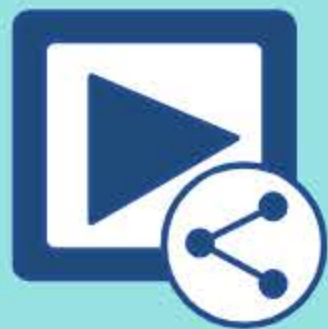

## 5 SCREEN AND EDIT STORIES

Ethically review and edit stories to protect storytellers and eliminate sharing of misinformation

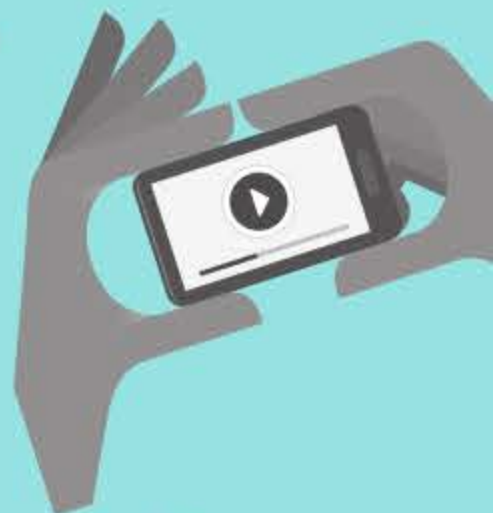

## 6 BUILD AN ONLINE, SEARCHABLE LIBRARY

Conduct web development to ensure that the resource is searchable and easy to use

## 7 MARKET THE RESOURCE

Invite multiple communities to participate in using the new resource

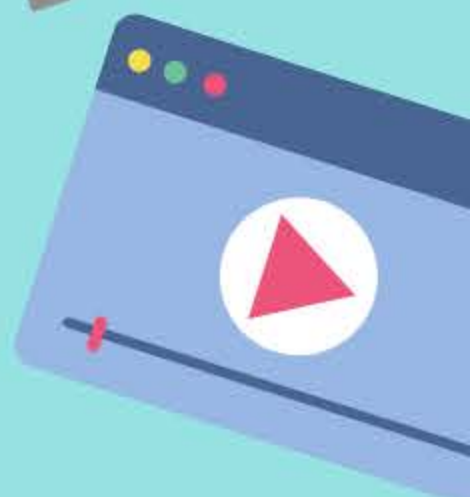

Supplement: formative_v4i7e17441_app1.pdf [file formative_v4i7e17441_app1.pdf]
