# Supplementary material for: A Digital Library for Increasing Awareness About Living Donor Kidney Transplants: Formative Study
Source: PubMed Central journal article supplement (PMC7404010; doi:10.2196/17441), 2020-07-21

## All Videos

Search and browse all the videos

This library keeps growing. Watch the videos we have now and please consider adding your own story.

Select a gender

Select a location

Select a race / ethnicity

Select a living donation story type

See results

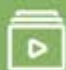

Search the library

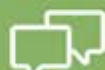

Tell your story

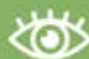

Learn more

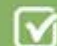

Subscribe for updates

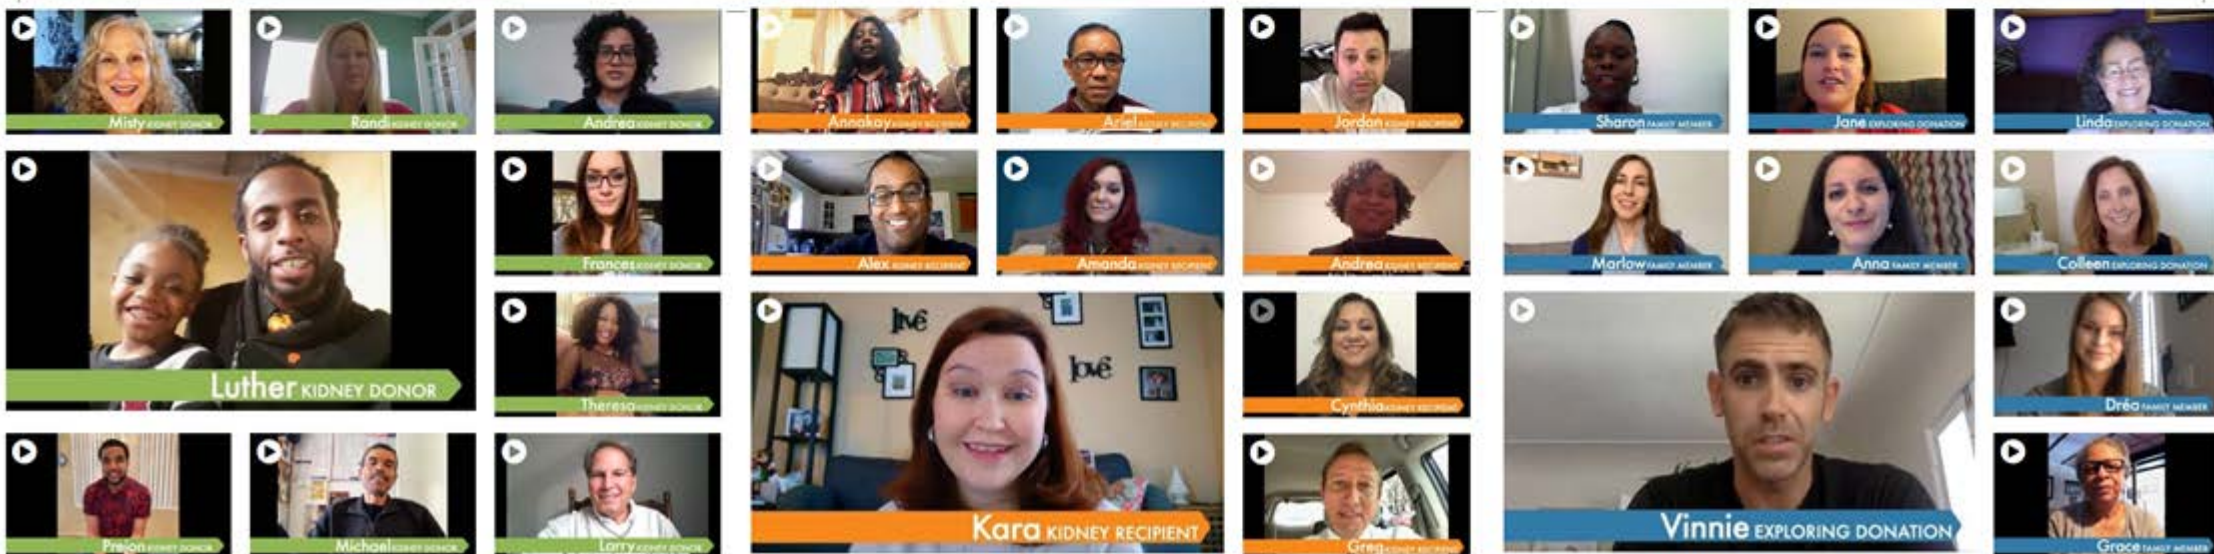

Supplement: formative_v4i7e17441_app2.pdf [file formative_v4i7e17441_app2.pdf]
