# Supplementary material for: A Digital Library for Increasing Awareness About Living Donor Kidney Transplants: Formative Study
Source: PubMed Central journal article supplement (PMC7404010; doi:10.2196/17441), 2020-07-21

# Find a transplant center near you

Zip or city or state

90024

Search this radius

10 mi

Results

50

Search

## University of California at Los Angeles

### Medical Center

757 Westwood Plaza  
Los Angeles CA 90095  
United States

Phone: (800) 825-2631

0.6 mi

[Directions](#)

## Cedars-Sinai Medical Center

8700 W. Beverly Boulevard  
Los Angeles CA 90048  
United States

Phone: (800) 303-6235

3.3 mi

[Directions](#)

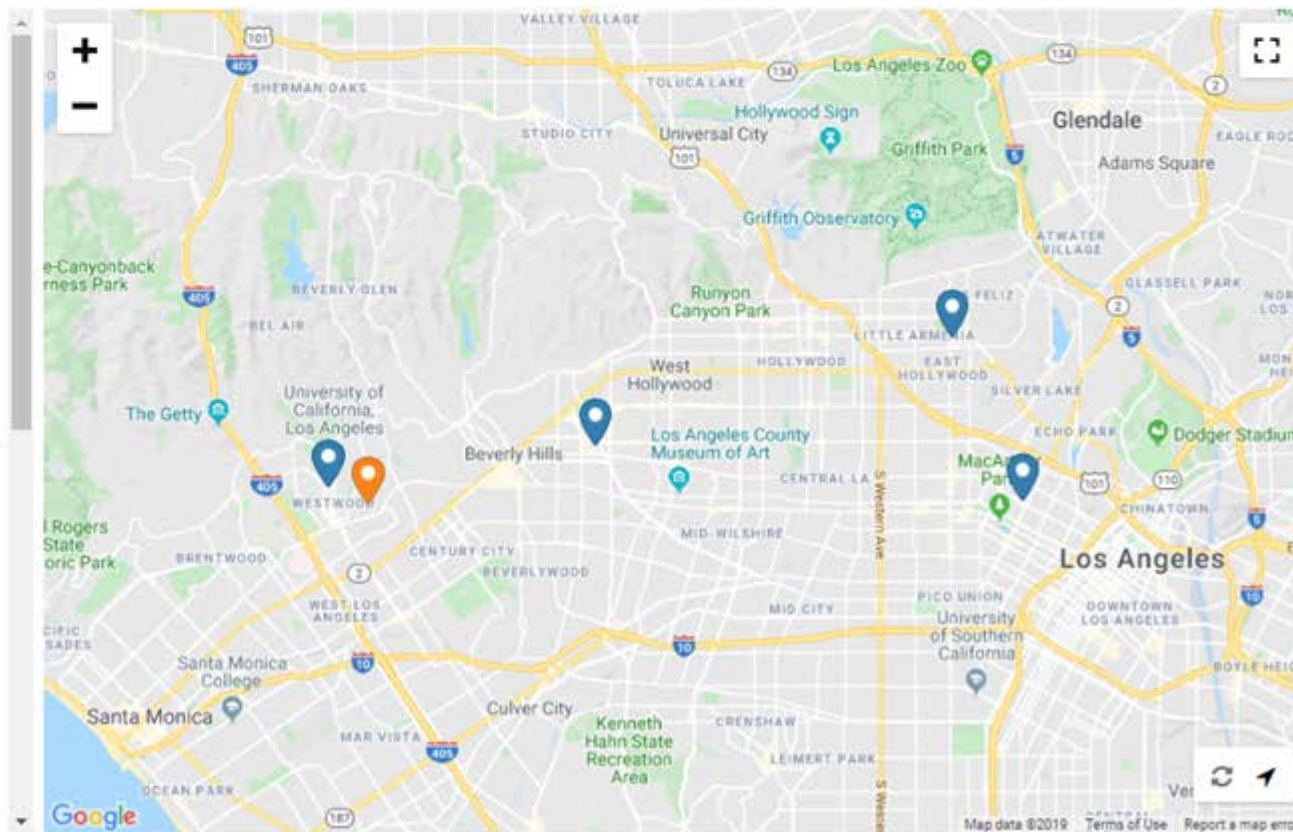

Supplement: formative_v4i7e17441_app4.pdf [file formative_v4i7e17441_app4.pdf]
